# Supplementary material
Source: Springer Nature journal article supplement (https://www.springermedizin.de/resource/supplementary/13023_2014_750_MOESM12_ESM.pdf/9642974)

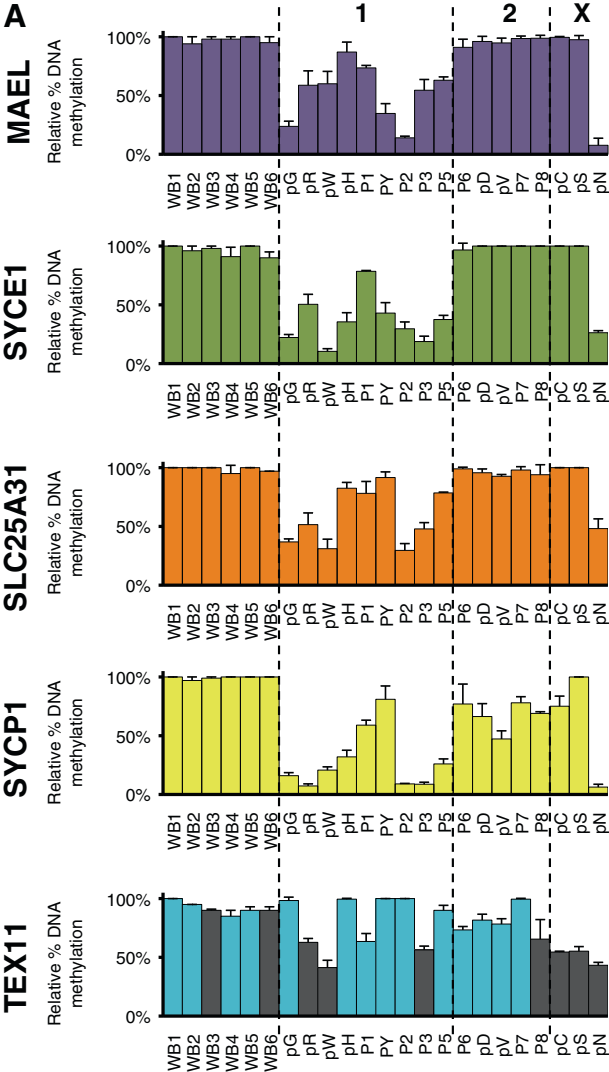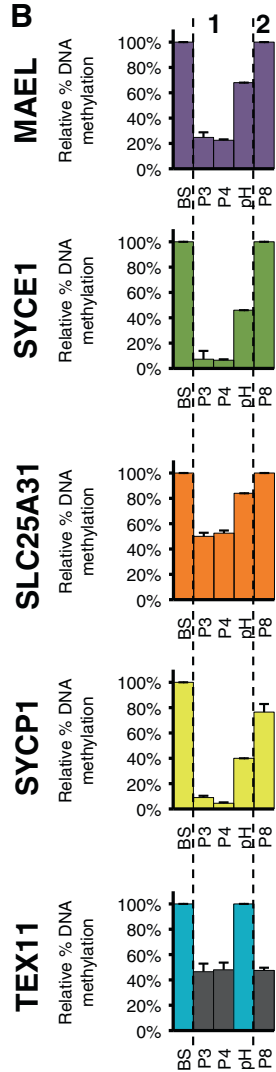

Supplement: MOESM12 [file 9642974]
